# Locally adaptive temperature response of vegetative growth in *Arabidopsis thaliana*

Pieter Clauw<sup>1,✉</sup>, Envel Kerdaffrec<sup>2</sup>, Joanna Gunis<sup>1</sup>, Ilka Reichardt<sup>3</sup>, Viktoria Nizhynska<sup>1</sup>, Stefanie Koemeda<sup>4</sup>, Jakub Jez<sup>4</sup>, and Magnus Nordborg<sup>1,✉</sup>

<sup>1</sup>Gregor Mendel Institute of Molecular Plant Biology, Austrian Academy of Sciences, Vienna BioCenter (VBC), 1030 Vienna, Austria

<sup>2</sup>Department of Biology, University of Fribourg, CH-1700 Fribourg, Switzerland

<sup>3</sup>Max Planck Institute of Molecular Cell Biology and Genetics, Dresden, 01307 Dresden, Germany

<sup>4</sup>Plant Sciences Facility, Vienna BioCenter Core Facilities GmbH (VBCF), 1030 Vienna, Austria

1 We investigated early vegetative growth of natural *Arabidop-* 45  
2 *sis thaliana* accessions in cold, non-freezing temperatures, sim- 46  
3 ilar to temperatures these plants naturally encounter in fall at 47  
4 northern latitudes. We found that accessions from northern lat- 48  
5 itudes produced larger seedlings than accessions from southern 49  
6 latitudes, partly as a result of larger seed size. However, their 50  
7 subsequent vegetative growth when exposed to colder tempera- 51  
8 tures was slower. The difference was too large to be explained by 52  
9 random population differentiation, and is thus suggestive of loc- 53  
10 al adaptation, a notion that is further supported by substantial 54  
11 transcriptome and metabolome changes in northern accessions. 55  
12 We hypothesize that the reduced growth of northern accessions 56  
13 is an adaptive response, and a consequence of reallocating re- 57  
14 sources towards cold acclimation and winter survival.

15 Correspondence:

16 [pieter.clauw@gmi.oeaw.ac.at](mailto:pieter.clauw@gmi.oeaw.ac.at)

17 [magnus.nordborg@gmi.oeaw.ac.at](mailto:magnus.nordborg@gmi.oeaw.ac.at)

## 18 Introduction

19 Local adaptation studies in *Arabidopsis thaliana* have found 63  
20 important roles for life history traits such as seed dormancy 64  
21 and flowering time (1). Temperature is a main regulator of 65  
22 these traits and local populations are adapted to their local 66  
23 temperatures (2–4). Also plant growth is affected by tem- 67  
24 perature and previous studies have detected genetic variation 68  
25 underlying rosette sizes and growth rates (5, 6) as well as 69  
26 signals of polygenic adaptation (7). How vegetative growth 70  
27 is adapted to local temperatures remains unclear, however.

28 Growth can be seen as the end-sum of a vast number of phys- 71  
29 iological processes. All of these are genetically determined 72  
30 but can also be heavily influenced by environmental condi- 73  
31 tions. Growth is therefore not only genetically a complex 74  
32 trait but also enormously plastic. The most straightforward 75  
33 environmental effect is when conditions are so adverse that 76  
34 growth reaches a physiological limit, making it impossible 77  
35 for the plant to grow any further. This is so-called “passive 78  
36 plasticity” (8, 9). Yet, when survival is at stake, it may also 79  
37 be in the interest of the plant to actively inhibit growth upon 80  
38 deteriorating environmental conditions (10) so-called “active 81  
39 plasticity” (8, 9). Since vegetative growth ultimately deter- 82  
40 mines photosynthetic surface and thus energy input that can 83  
41 be invested in the next generation, it is in direct trade-off with 84  
42 survival. Allocation of resources towards either growth or 85  
43 survival is thus an important balance to keep, and plants are 86  
44 expected to be adapted to constantly perceiving and respond-

ing to specific environmental changes as cues for upcoming, 45  
potentially, adverse conditions.

Cold acclimation is a well-studied example of plants sens- 46  
ing cold temperatures as a cue for upcoming winter and 47  
consequently preparing for freezing temperatures. The in- 48  
creased freezing tolerance upon cold acclimations is accom- 49  
plished by changing membrane composition, producing cry- 50  
oprotective polypeptides such as COR15A (11, 12) and ac- 51  
cumulating compatible solutes with cryoprotective properties 52  
such as raffinose, sucrose and proline (13–15). Main regula- 53  
tors of cold acclimation are CBF1/DREB1b, CBF2/DREB1c 54  
and CBF3/DREB1a, three AP2/ERF transcription factors, for 55  
which allelic variation in CBF2 has been linked to natural 56  
variation in freezing tolerance (16–18).

57 Here we investigated the role of growth in adaptation to cold 58  
59 temperatures by comparing vegetative growth of 249 acces- 60  
61 sions (Figure 1) grown in 16°C and 6°C for a period of 3 62  
63 weeks following seedling establishment (Figure 2). Rosette 64  
65 growth of each plant was measured twice a day during tem- 66  
67 perature treatments, using automated phenotyping. The ex- 68  
69 periment generated rosette growth estimates at a high tempo- 70  
71 ral resolution in two ecologically realistic temperature con- 72  
73 ditions in a wide set of accessions, allowing us to look for 74  
75 patterns of local adaptation.

## 76 Results

### 77 Estimating plant growth parameters.

78 Our experiment yielded dense (two measurements per day) 79  
80 time series growth data for over 7,000 individual plants (249 81  
82 accessions X 2 treatments X 5 replicate accessions X 3 re- 83  
84 peated experiments). These data were used to model plant 85  
86 growth and estimate growth parameters for further analysis. 87  
Unlimited growth should be exponential, but plant growth 88  
is known to slow down with increasing size, and therefore 89  
is a better fit than a pure exponential function (for which  $\beta = 1$  90  
— in the equation,  $M$  is the size,  $r$  is the growth rate, and  $\beta$  91  
is a scaling factor that allows rate of size increase to change 92  
with size). Growth according to a power-law function de- 93  
scribes early stages of plant growth especially well (20) for 94  
the rosette size measurements in this study. To calculate 95  
the rosette size from a power-law function at a given time 96  
point only three parameters are required: the initial size ( $M_0$ ),

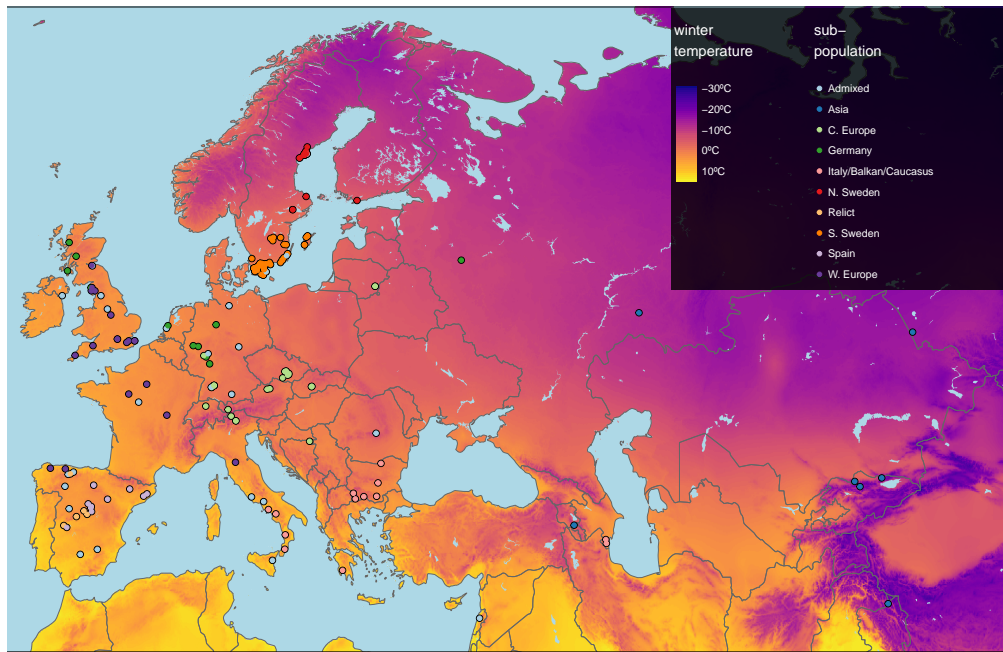

**Fig. 1.** Geographic origin of the 249 accessions. Map color shows winter temperature (mean temperature of coldest quarter). Accessions are colored according to sub-population (19).

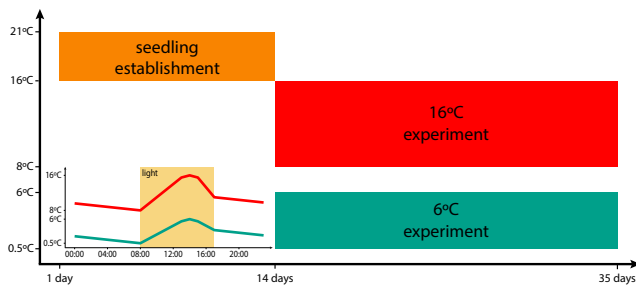

**Fig. 2.** Timeline of the experiments. Upon vernalisation, seeds germinated and seedlings established over 14 days. After 14 days plants were exposed to either 16°C treatment or 6°C treatment. Insert shows the 24 hour temperature profile for the 16°C (red) and 6°C (green) treatments, with light period indicated in yellow.

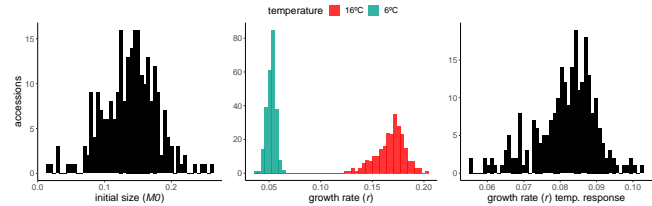

**Fig. 3.** Variation among accessions of initial size ( $M_0$ ), growth rate ( $r$ ) and the temperature response of the growth rate.

87 growth rate ( $r$ ), and  $\beta$ . Note that  $M_0$  is the rosette size at the  
 88 start of the temperature treatment 14 days after stratification  
 89 (Figure 2) and is thus not affected by the temperature treat-  
 90 ment. We used a non-linear mixed model to obtain estimates  
 91 for the initial size, growth rates and beta. Accession was  
 92 added as fixed effect for initial size and growth rate, temper-  
 93 ature and accession X temperature interactions were added  
 94 as fixed effects for growth rate only.  $\beta$  was considered to be  
 95 constant over accessions and temperatures. The “temperature  
 96 response” of the growth rate was calculated for each acces-  
 97 sion as the slope between the growth rate at 16°C and 6°C. As  
 98 expected, all accessions grew faster when it was warmer. The  
 99 observed phenotypic variation (Figure 3) is to a large extent  
 100 explained by genetic variation; broad-sense heritabilities are  
 101 0.41 for initial size, and 0.57 and 0.32 for growth rate at 16°C  
 102 and 6°C respectively.

### Growth parameters correlate with the environment of origin.

103 If growth rates are locally adaptive, they may reflect the envi-  
 104  
 105

ronment of origin of each accession. To investigate this, we  
 correlated our estimated growth rates with climate data. The  
 climate variables showing the strongest correlations with the  
 different growth parameters were linked to temperature dur-  
 ing winter months (Figure S1), also when correlations were  
 corrected for population structure (Figure S2). In particular,  
 the mean temperature during the coldest quarter (henceforth  
 referred to as “winter temperature”) was strongly correlated  
 with our parameter estimates, and we focus on it in what fol-  
 lows.

#### Initial size.

Accessions from colder climates generally had higher initial  
 rosette size ( $M_0$ ), 2 weeks after germination, than accessions  
 from warmer climates, but then grew more slowly during the  
 temperature experiment — regardless of temperature regime  
 (Figure 4).

At least part of the explanation for this pattern is likely to  
 be differences in seed size between accessions. Using seed  
 size measurements from previous experiments, we found that  
 seed size is positively correlated with initial size, and also  
 with winter temperature (Figure S3), at least for the subset  
 of 123 Swedish accessions. Winter temperature is still sig-  
 nificantly associated with initial size when corrected for seed

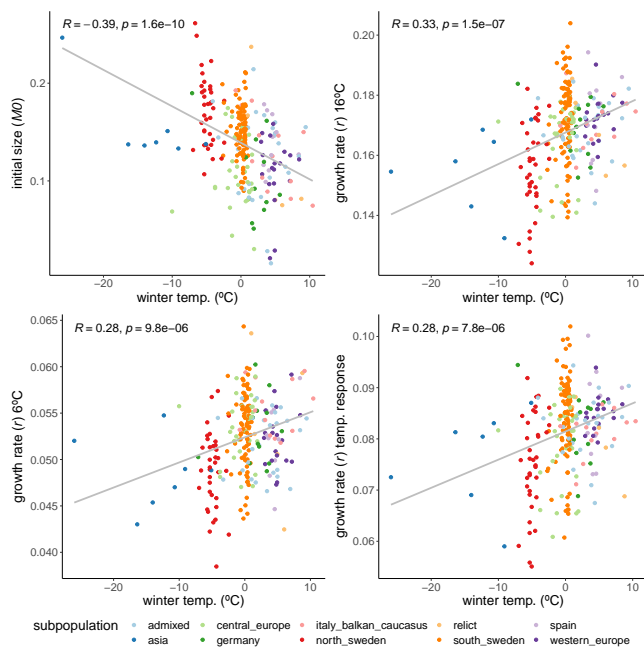

**Fig. 4.** Variation among accessions of initial size ( $M_0$ ), growth rate ( $r$ ) and the temperature response of the growth rate.

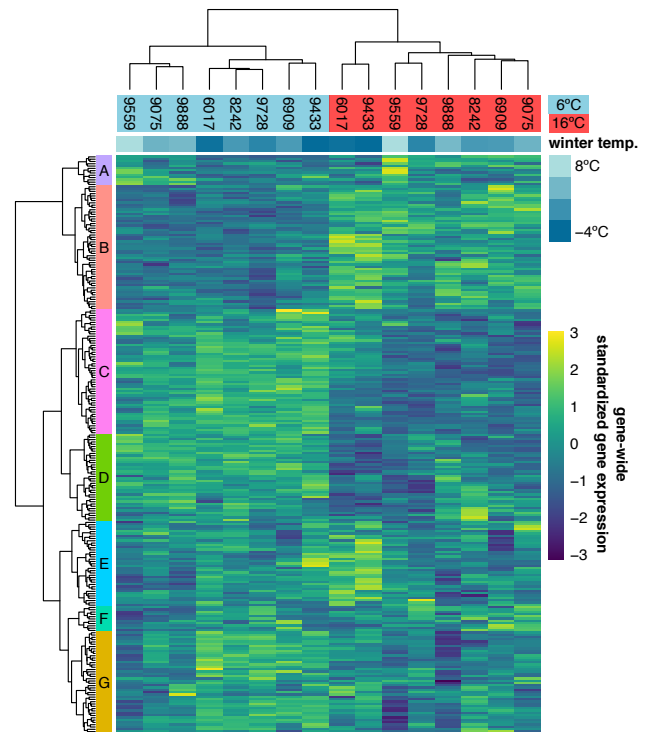

**Fig. 5.** Expression of known cold acclimation genes. Expression is shown as the gene-wide z-scores of the normalized counts. The z-scores allow for grouping genes with a similar expression behavior over the different accessions in both temperatures. The top bar indicates winter temperature ( $^{\circ}\text{C}$ ) for each accession's origin. Both dendrograms along y-axis and x-axis respectively show hierarchical clustering of genes, and of accessions in both temperatures.

129 size by adding it as a random effect. Seed size alone can  
130 therefore not explain the geographic pattern we observe for  
131 initial size and there must be a role for variation in growth  
132 rate during the very initial phases of seedling growth.

### Growth rates.

134 While the initial sizes correlate negatively with winter  
135 temperature, we observed the opposite relation for the growth  
136 rates. Despite being larger initially, accessions from colder  
137 climates grew more slowly during both the 16 $^{\circ}\text{C}$  and 6 $^{\circ}\text{C}$   
138 treatments (Figure 4). Since resources are not limiting, this  
139 suggests that the northern lines are actively inhibiting their  
140 growth, and that growing slower may be beneficial in colder  
141 climates, perhaps in preparation for winter. Accessions from  
142 colder climates were also less sensitive to the temperature  
143 experiment in the sense that the temperature response of the  
144 growth rate increased with winter temperature of origin (Fig-  
145 ure 4).

### Cold acclimation response

147 In agreement with the variation in growth rates, metabo-  
148 lite measurements taken at the final day of our experi-  
149 ment showed clear differences between accessions from cold  
150 and warm regions, and many of these differences involved  
151 metabolites with a known role in cold acclimation (21). Since  
152 the transcriptomic component of cold acclimation is well  
153 studied, we analyzed the expression profiles of 251 known  
154 cold acclimation genes in 8 accessions chosen to be represen-  
155 tative in terms of their growth and metabolome profiles (Fig-  
156 ure S4). The selected genes are known to be differentially  
157 expressed upon exposure to cold, and their expression is un-  
158 der control of at least one of the known transcription factors  
159 regulating cold acclimation: CBF1, CBF2, CBF3, HSFC1  
160 (22) or ZAT12 (23). In our experiment, expression of these

161 genes is likewise more affected by temperature than expected  
162 by chance (Figure 5;  $\chi^2$ -test: p-value < 0.001), and separates  
163 the two accessions from the coldest region (northern Sweden)  
164 from the rest in the 16 $^{\circ}\text{C}$  treatment, and the three accessions  
165 from the warmest regions (Spain and Azerbaijan) from the  
166 rest in the 6 $^{\circ}\text{C}$  treatment. Expression of different subsets of  
167 the selected cold-acclimation genes show clear correlations  
168 with winter temperature of origin (Figure S5). In particu-  
169 lar, the genes that were previously found to be up-regulated  
170 upon cold exposure showed higher expression in accessions  
171 from cold climates (Figure S6). Since the expression of these  
172 cold acclimation genes is linked to the strength of cold accli-  
173 mation, these accessions likely differ in their ability to cope  
174 with freezing temperatures upon cold treatment.

### Growth is polygenic and shows signs of local adaptation

175 We used genome-wide association to investigate the genetic  
176 architecture underlying variation for the different growth pa-  
177 rameters (Figure S7). The most significant association was  
178 found for overall growth rate in 16 $^{\circ}\text{C}$  (Figure 6). Inflated sig-  
179 nificance levels after correcting for population structure are  
180 consistent with what we would expect from a polygenic trait  
181 (Figure 6) and were also observed for the other traits, ex-  
182 cept for growth rate in 6 $^{\circ}\text{C}$  (Figure S7). Plausible candi-  
183 dates within 10kb of the most significant SNP (chr5:23,334,281)  
184 include *CIPK21* and *MYB36*. *CIPK21* encodes a CBL-



187 interacting protein kinase that is upregulated in cold condi- 243  
188 tions and is involved in the salt and osmotic stress response 244  
189 (24). MYB36 is a key regulator of root endodermal differ- 245  
190 entiation (25). Slightly more distant, 22kb away, is *COL5*, a 246  
191 transcription factor that is part of the gene network that is reg- 247  
192 ulated by AN3, a regulator of cell proliferation in leaf growth 248  
193 (26). 249

194 To test for potential polygenic adaptation, we compared the 250  
195 phenotypic divergence to the expected neutral genome-wide 251  
196 genetic divergence. This can be done using a so-called 252  
197  $Q_{ST} - F_{ST}$  test (27–29), however this test is not well suited 253  
198 for species with complex population structure, and so we 254  
199 used a variation that was designed to detect adaptive differ- 255  
200 entiation for traits measured in structured GWAS panels (30). 256  
201 Instead of looking at divergences between predefined popu- 257  
202 lations, this method uses principal components (PCs) of the 258  
203 genetic relatedness matrix as axes of potential adaptive dif- 259  
204 ferentiation. Adaptive differentiation is then detected as a 260  
205 correlation between the focal phenotype and any of these re- 261  
206 latedness PCs that is significantly different than expected un- 262  
207 der neutrality. 263

208 Adaptive differentiation was detected for initial size and for 264  
209 growth rate in 16°C and its temperature response. Both traits 265  
210 show adaptive differentiation along different genetic axes 266  
211 (Figure 7). Initial size shows significant adaptive differen- 267  
212 tiation along PC6 (p-value < 0.05), whereas growth rate in 268  
213 16°C and its temperature response showed significant adap- 269  
214 tive differentiation along PC5 (p-values < 0.05). The adaptive 270  
215 differentiation for initial size along PC6 seems to stem from 271  
216 higher initial sizes in Swedish accessions, compared to cen- 272  
217 tral European accessions. The adaptive differentiation along 273  
218 PC5 seems to be driven by the lower growth rate temperature 274  
219 responses in Asian and Northern Swedish accessions in con- 275  
220 trast to higher growth rates in a subset of southern Swedish 276  
221 accessions. The accessions in our set that come from North- 277  
222 ern Sweden and Asia hail from the coldest climates. Thus 278  
223 these results suggest adaptive differentiation driven by adap- 279  
224 tation to cold winters. 280

## 225 Discussion 282

226 This study explores the natural variation of rosette growth 283  
227 in non-freezing temperatures. Despite high plasticity, we de- 284  
228 tect genetic variation for the different growth parameters, and 285  
229 environmental correlations suggest local adaptation. GWAS 286  
230 analyses reveal, not surprisingly, a polygenic trait architec- 287  
231 ture. Indeed, across the genome we detect adaptive differen- 288  
232 tiation for certain growth parameters. We speculated that the 289  
233 slower growth measured in accessions from colder climates 290  
234 reflect relocation of resources from growth towards cold ac- 291  
235 climation. Both metabolome and gene expression data are 292  
236 consistent with accessions from colder climates preparing for 293  
237 a harsh winter. In our temperature experiment, we see that the 294  
238 growth of northern lines is affected less than southern lines by 295  
239 switching from 16°C to 6°C. 296

240 Our conclusion that slower growth is likely adaptive in pop- 297  
241 ulations facing fiercer winters is in line with recent results of 298  
242 Wieters et al. (7), who concluded that the reduced growth 299

in Northern lines was adaptive and not a consequence of an  
accumulation of deleterious mutations at the species border.  
If slower growth were indeed a consequence of accumulated  
deleterious mutations we would expect to see slower growth  
also during the initial seedling establishment. On the con-  
trary, we saw a fast seedling establishment for accessions  
from colder regions. We speculate that the fast seedling es-  
tablishment is a potential adaptation for short growth seasons,  
which often coincide with colder climates (high latitude or  
high altitude). This fast seedling establishment seems to be  
partly supported by larger seeds. These larger seeds may  
provide more nutrients to initiate faster seedling establish-  
ment, while this is of less importance in warmer climates with  
longer growth seasons. Further work is needed to disentangle  
initial growth from seed size effects and confirm that there is  
a causal relationship between seed size and fast seedling es-  
tablishment, whether this is due to seed nutrient storage, and  
whether it is adaptive.

The adaptation of growth to local climates is likely to be  
influenced by a trade-off with cold acclimation. General  
growth-survival trade-offs have long been observed and are  
described in general ecological strategy schemes such as  
Grime's C-S-R triangle (31) and the leaf-height-seed scheme  
(32). Specific trade-offs between growth and cold/frost sur-  
vival were observed for wheat (33, 34), alfalfa (35), *Dactylis  
glomerata* (36), and multiple tree species (37–40). Here we  
observed higher expression of genes involved in cold accli-  
mation in accessions from colder regions. Even though this  
is based on a limited set of 8 accessions, metabolome mea-  
surements in all 249 accessions lead to the same conclusion.  
Metabolites involved in cold acclimation such as raffinose,  
sucrose and proline were found in higher concentrations in  
accessions from colder climates (21). We believe that acces-  
sions from colder environments are relocating more energy  
and resources from growth towards preparations for upcom-  
ing freezing temperatures. This likely results in stronger cold  
acclimation and consequently increased freezing tolerance in  
the accessions from colder regions. Indeed, accessions origi-  
nating from colder environments show increased freezing tol-  
erance upon cold acclimation (41–44).

There is strong evidence from QTL mapping that genetic  
variation in the *CBF2* gene is one of the drivers for adap-  
tation to freezing stress (16, 45). Here we looked at growth  
phenotypes and did not detect associations with the CBF loci.  
In the transcriptome analysis we did pick-up a role for CBF  
and other known cold-acclimation genes. The most signif-  
icant locus detected in our GWAS analysis (for growth rate  
in 16°C) lies in the vicinity of *COL5*, a gene that is part of a  
leaf growth regulatory network (26) and whose expression is  
induced by both cold treatment and *CBF1*, *CBF2* and *CBF3*  
overexpression (22). In our transcriptome data, the *COL5*  
gene was found in cluster D, showing higher expression in  
accessions coming from warmer regions. It is however un-  
clear what its exact regulatory role in growth in cold condi-  
tions might be.

In summary, we detected adaptive differentiation for growth  
between accessions from warm and cold climates. Our tran-

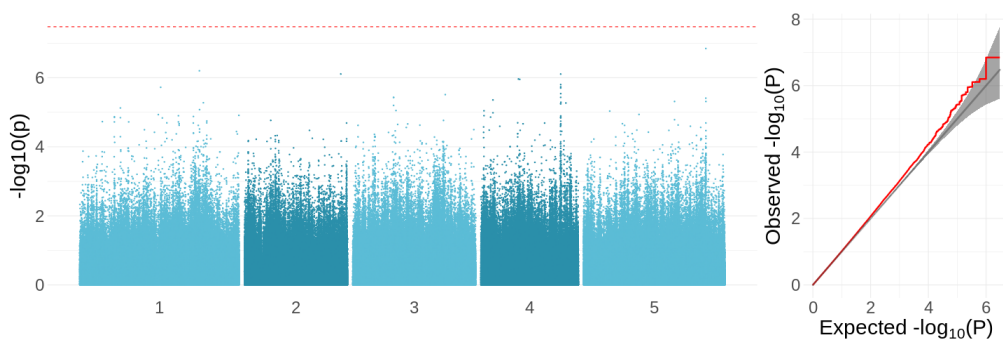

**Fig. 6.** GWAS results for the growth rate in 16°C. (A) Manhattan plot showing the significance of the association between the phenotype and each of the tested SNPs (MAF > 10%). The Bonferroni-corrected threshold is shown with a dashed red line. (B) QQ-plot showing the relation between observed and expected  $-\log_{10}(p)$  distributions. Red line shows the observed relationship. The gray line and band show the expected relationship under the null hypothesis of no differentiation between both distributions.

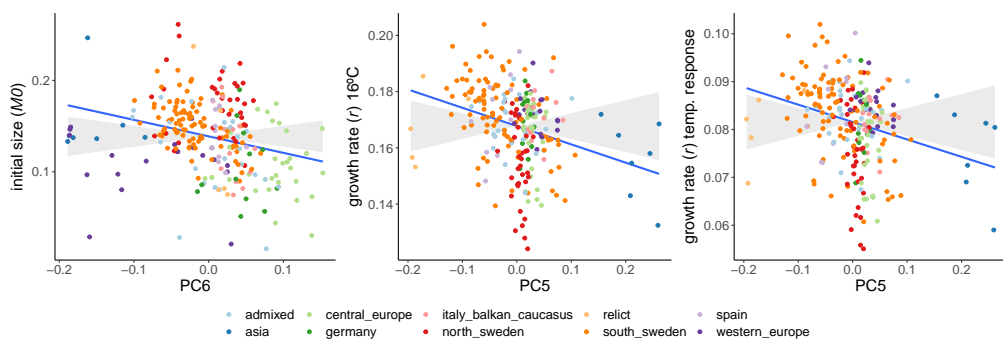

**Fig. 7.** Adaptive differentiation of initial size, growth rate at 16°C, and the temperature response of growth rate along different axes of genetic differentiation. Accessions are coloured according to their respective admixture groups, as specified in (19). The gray ribbon represents the expected correlation between phenotype and axis of genetic differentiation under neutrality. The blue line represents the observed correlation between phenotype and axis of genetic differentiation.

300 scriptome data and previous metabolome data suggest that 328  
 301 resources are relocated from growth to cold acclimation in 329  
 302 accessions from colder regions. This allows these accessions 330  
 303 to be fully prepared for the coming of winter. 331

## 304 Materials and Methods

### 305 Plant growth and phenotyping.

306 Seeds of 249 natural accessions (Suppl. Data 1) of *Arabidop-* 328  
 307 *sis thaliana* described in the 1001 genomes project (19) were 329  
 308 sown on sieved (6 mm) substrate (Einheitserde ED63). Pots 330  
 309 were filled with 71.5 g  $\pm$  1.5 g of soil to assure homogenous 331  
 310 packing. The prepared pots were all covered with blue mats 332  
 311 (46) to enable a robust performance of the high-throughput 333  
 312 image analysis algorithm. Seeds were stratified (4 days at 334  
 313 4°C in darkness) after which they germinated and left to grow 335  
 314 for 2 weeks at 21°C (relative humidity: 55%; light intensity: 336  
 315 160  $\mu\text{mol m}^{-2} \text{s}^{-1}$ ; 14 h light). The temperature treatments 337  
 316 were started by transferring the seedlings to either 6 °C or 338  
 317 16 °C. To simulate natural conditions temperatures fluctuated 339  
 318 diurnally between 16-21 °C, 0.5-6 °C and 8-16 °C for 340  
 319 the 21 °C initial growth conditions and the 6 °C and 16 °C 341  
 320 treatments, respectively (Figure 2). Light intensity was kept 342  
 321 constant at 160  $\mu\text{mol m}^{-2} \text{s}^{-1}$  throughout the experiment. 343  
 322 Relative humidity was set at 55% but in colder temperatures 344  
 323 it rose uncontrollably to maximum 95%. Daylength was 9h 345  
 324 during the 16°C and 6°C treatments. Each temperature treat- 346  
 325 ment was repeated in three independent experiments. Five 347  
 326 replicate plants were grown for every genotype per experi- 348  
 327 ment. Plants were randomly distributed across the growth 349  
 350  
 351

chamber with an independent randomisation pattern for each 328  
 experiment. During the temperature treatments (14 DAS – 329  
 35 DAS), plants were photographed twice a day (1 hour after/ 330  
 before lights switched on/off), using an RGB camera (IDS 331  
 uEye UI-548xRE-C; 5MP) mounted to a robotic arm. At 332  
 35 DAS, whole rosettes were harvested, immediately frozen 333  
 in liquid nitrogen and stored at -80°C until further analy- 334  
 sis. Rosette areas were extracted from the plant images using 335  
 Lemnatec OS (LemnaTec GmbH, Aachen, Germany) soft- 336  
 ware. 337

### 338 Non-linear modeling.

339 Non-linear modeling was used to describe plant growth in 340  
 a minimum number of parameters. In a first step we con- 341  
 342 structed a simple non-linear model with plant size being ex- 343  
 344 plained by either the exponential (equation 1) or the power- 345  
 law function (equation 2), with individual plant as a random 346  
 effect for each of the model parameters;  $M_0$ ,  $r$  and. With be- 347  
 ing only present in the power-law model. Models were con- 348  
 349 structed using the nlsList and nlme functions from the nlme 350  
 package for R. Exponential and power-law SelfStart func- 351  
 tions were used from Paine et al. (20). Based on Akaike 352  
 Information criterion and likelihood ratio test generated by 353  
 the anova function, we decided to use the power-law model 354  
 for further analyses. 355

$$\frac{dM}{dt} = rM \quad (1a)$$

$$M_t = M_0 e^{rt} \quad (1b)$$

$$\frac{dM}{dt} = rM^\beta \quad (2a)$$

$$M_t = (M_0^{1-\beta} + rt(1-\beta))^{1/1-\beta} \quad (2b)$$

In a second step, we constructed a model with fixed effects for the different power-law parameters. For initial size ( $M_0$ ) we added accession as fixed effect. Temperature treatment only started from the initial time point onwards, and thus could not have an effect on the initial plant size. The growth rate, on the other hand, should be affected by temperature, therefore we included accession, temperature and their interaction as fixed effects for growth rate ( $r$ ). No fixed effects were added for  $\beta$ . The idea here is that is an adjustment factor for decreasing growth rates (when  $\beta < 1$ ) with increasing plant sizes, which is general for plant growth, or at least for our data in this case. Individuals, nested with experiment, were added as random effects for each of the model parameters. The correlation structure intrinsic to measuring the same individuals over time was accounted for by adding the first order continuous autoregressive correlation structure (corCAR1). The estimated fixed effects of this model were then used to obtain initial size estimates for each accession and growth rate estimates for each accession in both temperatures. These estimates were used for all further analyses. Exceptions to this are the broad-sense heritabilities, which were based on initial size and growth rate estimates that were obtained by including random effects, in order to get estimates for each individual plant.

### Climate correlations.

The different phenotypes were correlated with each of the different (bio)climate variables downloaded from [www.worldclim.org](http://www.worldclim.org) (47). Correlations were calculated as Pearson's correlations using the `cor` function in R (48). Population structure may confound the correlation between phenotype and climate. Therefore we included a population structure corrected phenotype-climate correlation (Figure S2). To this end we used a mixed-effects model as implemented in the `lme4` function from the `coxme` package with phenotype as dependent variable, climate variable as fixed effects and the kinship matrix as random effect. Phenotype and climate variables were standardized, so that regression coefficients were comparable to correlation coefficients. Even though the strength and significance of the correlations weaken upon population structure correction, the growth parameters still demonstrate the same pattern of most strongly correlating with winter temperatures.

### Seed size correlations.

We used the seeds produced by (49) and limited our measurements to the set of 123 Swedish accessions that overlapped with our growth dataset. After seed stratification for four days at 4°C in darkness, mother plants were grown for 8 weeks at 4°C under long-day conditions (16h light; 8h dark) to ensure proper vernalization. Temperature was raised to 21°C (light) and 16°C (dark) for flowering and seed ripen-

ing. Seeds were kept in darkness at 16°C and 30% relative humidity, from the harvest until seed size measurements. For each genotype three replicates were pooled and about 200-300 seeds were sprinkled on 12 x 12 cm square, transparent Petri dishes. Image acquisition was performed as described in (50) by scanning dishes on a cluster of eight Epson V600 scanners. The resulting 1200 dpi .tiff images were analyzed in the ImageJ software (2.1.0/1.53c). Images were converted to 8-bit binary images and thresholded with the `setAutoThreshold("Defaultdark")` command, and seed area was measured in squared mm by running the `Analyse Particles` command (inclusion parameters: `size=0.04-0.25` `circularity=0.70-1.00`). All scripts used for image processing are available at [https://github.com/vevel/seed\\_size](https://github.com/vevel/seed_size).

### Transcriptome profiling.

35 days after stratification, rosette tissue of all plants were harvested and flash frozen in liquid nitrogen. Random samples in each replicate and temperature were taken for 8 accessions to profile the transcriptome with RNA-sequencing. Total RNA was extracted using the KingFisher Duo Prime System (Thermo Fisher Scientific) together with a high performance RNA bead isolation kit (Molecular Biology Service, VBC Core Facilities, Vienna). To determine the quantity of RNA samples we used Fluorometer Qubit 4 (Invitrogen) and Qubit RNA BR Kit (Invitrogen). For each sample, 1 µg of total RNA was treated with the poly(A) RNA Selection Kit (Lexogen) and eluted in 12 µl of Nuclease-Free Water. Libraries were prepared according to the manufacturer's protocol in NEBNext Ultra II Directional RNA Library Prep Kit (New England BioLabs) and individually indexed with NEBNext Multiplex Oligos for Illumina (New England Biolabs). The quantity and quality of each amplified library were analyzed by using Fragment Analyzer (Agilent) and HS NGS Fragment Kit (Agilent). Libraries were sequenced with an Illumina HiSeq2500 in paired-end mode with read-length of 125bp. Sequencing was performed by the Next Generation Sequencing Facility at Vienna BioCenter Core Facilities (VBCF), member of the Vienna BioCenter (VBC), Austria. Gene expression was quantified by using quasi-mapping in salmon, version 1.2.1 (51). The salmon indices were built separately for each accession, as we incorporated the SNP variation from the (19) into the reference transcriptome.

### Broad-sense heritabilities.

Broad-sense heritability ( $H^2$ ) for initial size was calculated using the estimates for each individual plant, over all experiments.  $H^2$  for growth rate was calculated separately for each temperature, again using estimates for each individual plant. A mixed model with genotype as random effect and experiment as fixed effects was used to estimate the variance explained by genotype ( $V_g$ ). Residual variance was taken as an environmental variance ( $V_e$ ).  $H^2$  was then calculated as the ratio between  $V_g$  and the sum of  $V_g$  and  $V_e$ . The mixed model was constructed with the `lmer` function in the `lme4` R package.



## 456 Genome-wide association mapping.

457 Genome-wide association mapping was done for each of the  
458 growth parameters, in both temperatures and also the temper-  
459 ature response for the growth rate. We used a mixed model  
460 with phenotype as dependent variable, genotype as fixed ef-  
461 fect and genetic relatedness as random factor. Genotypes  
462 non-imputed SNPs obtained from the 1001 genomes consorti-  
463 um (19). This model was run in GEMMA, version 0.98.3  
464 (52).

## 465 Testing for adaptive differentiation.

466 Adaptive differentiation was tested with the method de-  
467 scribed by Josephs et al. (30) and the accompanying R  
468 package `quaint` (<https://github.com/emjosephs/quaint>). Kin-  
469 ship matrix was calculated using the `make_k` function in the  
470 `quaint` package in R. Genetic principal components were then  
471 calculated from the eigen decomposition of the kinship ma-  
472 trix. Adaptive differentiation of each phenotype along the  
473 first 10 principal components was tested with the `calcQpc`  
474 function in the `quaint` R package. Principal components 11-  
475 248 were used to build the expected phenotypic differentia-  
476 tion under neutrality.

## 477 ACKNOWLEDGEMENTS

478 We want to thank past and current members of the Nordborg group for their help in  
479 setting up and harvesting these experiments. Thanks also to Daniele Filiault for her  
480 valuable comments on the manuscript.

## 481 Supplementary Information

482 Scripts can be found in  
483 [https://github.com/picla/growth\\_16C\\_6C/](https://github.com/picla/growth_16C_6C/). Scripts  
484 for seedsize analysis can be found in  
485 [https://github.com/vevel/seed\\_size](https://github.com/vevel/seed_size).

486 Supplemental dataset 1. List of all 249 accessions. Supple-  
487 mental dataset 2. Cold acclimation genes and their expres-  
488 sion cluster membership as shown in Figure 5.

489 All RNA-sequecing were uploaded to SRA under  
490 <http://www.ncbi.nlm.nih.gov/bioproject/807069> All gen-  
491 erated phenotyping data are filed under 10.5281/zen-  
492 odo.6076948

## 493 Bibliography

- 494 1. Margarita Takou, Benedict Wieters, Stanislav Kopriva, George Coupland, Anja Linstädter,  
495 and Juliette De Meaux. Linking genes with ecological strategies in *arabidopsis thaliana*. *J.*  
496 *Exp. Bot.*, 70(4):1141–1151, February 2019.
- 497 2. Alejandra Martínez-Berdeja, Michelle C Stitzer, Mark A Taylor, Miki Okada, Exequiel  
498 Ezcurra, Daniel E Runcie, and Johanna Schmitt. Functional variants of DOG1 control seed  
499 chilling responses and variation in seasonal life-history strategies in *arabidopsis thaliana*.  
500 *Proc. Natl. Acad. Sci. U. S. A.*, 117(5):2526–2534, February 2020.
- 501 3. Gordon G Simpson and Caroline Dean. *Arabidopsis*, the rosetta stone of flowering time?  
502 *Science*, 296(5566):285–289, April 2002.
- 503 4. Jo Hepworth, Rea L Antoniou-Kourounioti, Rebecca H Bloomer, Catja Selga, Kristina  
504 Berggren, Deborah Cox, Barley R Collier Harris, Judith A Irwin, Svante Holm, Torbjörn  
505 Säll, Martin Howard, and Caroline Dean. Absence of warmth permits epigenetic memory of  
506 winter in *arabidopsis*. *Nat. Commun.*, 9(1):639, February 2018.
- 507 5. Johanna A Bac-Molenaar, Dick Vreugdenhil, Christine Granier, and Joost J B Keurentjes.  
508 Genome-wide association mapping of growth dynamics detects time-specific and general  
509 quantitative trait loci. *J. Exp. Bot.*, 66(18):5567–5580, September 2015.
- 510 6. Elodie Marchadier, Mathieu Hanemian, Sébastien Tisné, Liën Bach, Christos Bazakos,  
511 Elodie Gilbert, Parham Haddadi, Laëtitia Virlovet, and Olivier Loudet. The complex ge-  
512 netic architecture of shoot growth natural variation in *arabidopsis thaliana*. *PLoS Genet.*, 15  
513 (4):e1007954, April 2019.
- 514 7. Benedict Wieters, Kim A Steige, Fei He, Evan M Koch, Sebastián E Ramos-Onsins, Hongya  
515 Gu, Ya-Long Guo, Shamil Sunyaev, and Juliette de Meaux. Polygenic adaptation of rosette  
516 growth in *arabidopsis thaliana*. *PLoS Genet.*, 17(1):e1008748, January 2021.
- 517 8. A Forsman. Rethinking phenotypic plasticity and its consequences for individuals, popula-  
518 tions and species. *Heredity*, 115(4):276–284, October 2015.
- 519 9. Mark Van Kleunen and Markus Fischer. Constraints on the evolution of adaptive phenotypic  
520 plasticity in plants, 2005.
- 521 10. Hannes Claeys and Dirk Inzé. The agony of choice: how plants balance growth and survival  
522 under water-limiting conditions. *Plant Physiol.*, 162(4):1768–1779, August 2013.
- 523 11. N N Artus, M Uemura, P L Steponkus, S J Gilmour, C Lin, and M F Thomashow. Constitutive  
524 expression of the cold-regulated *arabidopsis thaliana* COR15a gene affects both chloroplast  
525 and protoplast freezing tolerance. *Proc. Natl. Acad. Sci. U. S. A.*, 93(23):13404–13409,  
526 November 1996.
- 527 12. P L Steponkus, M Uemura, R A Joseph, S J Gilmour, and M F Thomashow. Mode of action  
528 of the COR15a gene on the freezing tolerance of *arabidopsis thaliana*. *Proc. Natl. Acad.*  
529 *Sci. U. S. A.*, 95(24):14570–14575, November 1998.
- 530 13. T Nanjo, M Kobayashi, Y Yoshida, Y Kakubari, K Yamaguchi-Shinozaki, and K Shinozaki.  
531 Antisense suppression of proline degradation improves tolerance to freezing and salinity in  
532 *arabidopsis thaliana*. *FEBS Lett.*, 461(3):205–210, November 1999.
- 533 14. Sarah J Gilmour, Audrey M Sebolt, Maite P Salazar, John D Everard, and Michael F  
534 Thomashow. Overexpression of the *arabidopsis* CBF3 transcriptional activator mimics mul-  
535 tiple biochemical changes associated with cold acclimation. *Plant Physiol.*, 124(4):1854–  
536 1865, December 2000.
- 537 15. Teruaki Taji, Chieko Ohsumi, Satoshi Iuchi, Motoaki Seki, Mie Kasuga, Masatomo  
538 Kobayashi, Kazuko Yamaguchi-Shinozaki, and Kazuo Shinozaki. Important roles of drought-  
539 and cold-inducible genes for galactinol synthase in stress tolerance in *arabidopsis thaliana*.  
540 *Plant J.*, 29(4):417–426, February 2002.
- 541 16. C G Oakley, J Ågren, R A Atchison, and others. QTL mapping of freezing tolerance: links  
542 to fitness and adaptive trade-offs. *Molecular*, 2014.
- 543 17. Sunchung Park, Sarah J Gilmour, Rebecca Grumet, and Michael F Thomashow. CBF-  
544 dependent and CBF-independent regulatory pathways contribute to the differences in freez-  
545 ing tolerance and cold-regulated gene expression of two *arabidopsis* ecotypes locally  
546 adapted to sites in sweden and italy. *PLoS One*, 13(12):e0207723, December 2018.
- 547 18. Carlos Alonso-Blanco, Concepción Gomez-Mena, Francisco Llorente, Maarten Koorneef,  
548 Julio Salinas, and José M Martínez-Zapater. Genetic and molecular analyses of natural  
549 variation indicate CBF2 as a candidate gene for underlying a freezing tolerance quantitative  
550 trait locus in *arabidopsis*. *Plant Physiol.*, 139(3):1304–1312, November 2005.
- 551 19. 1001 Genomes Consortium. 1,135 genomes reveal the global pattern of polymorphism in  
552 *arabidopsis thaliana*. *Cell*, 166(2):481–491, June 2016.
- 553 20. C E Timothy Paine, Toby R Marthews, Deborah R Vogt, Drew Purves, Mark Rees, Andy  
554 Hector, and Lindsay A Turnbull. How to fit nonlinear plant growth models and calculate  
555 growth rates: an update for ecologists. *Methods Ecol. Evol.*, 3(2):245–256, April 2012.
- 556 21. Jakob Weiszmann, Pieter Clauw, Joanna Jagoda, Ilka Reichardt-Gomez, Stefanie  
557 Koemeda, Jakob Jez, Magnus Nordborg, Dirk Walthert, Thomas Nägele, and Wolfram Weck-  
558 werth. Plasticity of the primary metabolome in 241 cold grown *arabidopsis thaliana* accessions  
559 and its relation to natural habitat temperature. preprint on BioRxiv, September 2020.
- 560 22. Sunchung Park, Chin-Mei Lee, Colleen J Doherty, Sarah J Gilmour, Yongsig Kim, and  
561 Michael F Thomashow. Regulation of the *arabidopsis* CBF regulon by a complex low-  
562 temperature regulatory network, 2015.
- 563 23. Jonathan T Vogel, Daniel G Zarka, Heather A Van Buskirk, Sarah G Fowler, and Michael F  
564 Thomashow. Roles of the CBF2 and ZAT12 transcription factors in configuring the low  
565 temperature transcriptome of *arabidopsis*. *Plant J.*, 41(2):195–211, January 2005.
- 566 24. Girdhar K Pandey, Poonam Kanwar, Amarjeet Singh, Leonie Steinhorst, Amita Pandey,  
567 Akhilesh K Yadav, Indu Tokas, Sibaji K Sanyal, Beom-Gi Kim, Sung-Chul Lee, Yong-Hwa  
568 Cheong, Jörg Kudla, and Sheng Luan. Calcineurin B-Like Protein-Interacting protein kinase  
569 CIPK21 regulates osmotic and salt stress responses in *arabidopsis*. *Plant Physiol.*, 169(1):  
570 780–792, September 2015.
- 571 25. Louisa M Liberman, Erin E Sparks, Miguel A Moreno-Risueno, Jalean J Petricka, and  
572 Philip N Benfey. MYB36 regulates the transition from proliferation to differentiation in the  
573 *arabidopsis* root. *Proc. Natl. Acad. Sci. U. S. A.*, 112(39):12099–12104, September 2015.
- 574 26. Liesbeth Vercruyssen, Aurine Verkest, Nathalie Gonzalez, Ken S Heyndrickx, Dominique  
575 Eeckhout, Soon-Ki Han, Teddy Jégu, Rafal Archacki, Jelle Van Leene, Megan Andriankaja,  
576 Stefanie De Bodt, Thomas Abeel, Frederik Coppens, Stijn Dhondt, Liesbeth De Milde, Mat-  
577 tias Vermeersch, Katrien Maleux, Kris Gevaert, Andrzej Jerzmanowski, Moussa Benhamed,  
578 Doris Wagner, Klaas Vandepoel, Geert De Jaeger, and Dirk Inzé. ANGUSTIFOLIA3 binds to  
579 SWI/SNF chromatin remodeling complexes to regulate transcription during *arabidopsis*  
580 leaf development. *Plant Cell*, 26(1):210–229, January 2014.
- 581 27. T Prout and J S Barker. F statistics in *drosophila buzzatii*: selection, population size and  
582 inbreeding. *Genetics*, 134(1):369–375, May 1993.
- 583 28. Michael C Whitlock. Evolutionary inference from QST. *Mol. Ecol.*, 17(8):1885–1896, April  
584 2008.
- 585 29. K Spitze. Population structure in *daphnia obtusa*: quantitative genetic and allozymic varia-  
586 tion. *Genetics*, 135(2):367–374, October 1993.
- 587 30. Emily B Josephs, Jeremy J Berg, Jeffrey Ross-Ibarra, and Graham Coop. Detecting adap-  
588 tive differentiation in structured populations with genomic data and common gardens. *Ge-  
589 netics*, 211(3):989–1004, March 2019.
- 590 31. J P Grime. Primary strategies in plants. *Transactions of the Botanical Society of Edinburgh*,  
591 43(2):151–160, November 1979.
- 592 32. Mark Westoby. A leaf-height-seed (LHS) plant ecology strategy scheme. *Plant Soil*, 199(2):  
593 213–227, February 1998.
- 594 33. H K Hayes and O S Aamodt. Inheritance of winter hardiness and growth habit in crosses of  
595 marquis with minhardi and minturki wheats. *J. Agric. Res.*, 35(223):236, 1927.
- 596 34. Karl S Quisenberry. *Inheritance of Winter Hardiness, Growth Habit, and Stem-rust Reaction in Crosses Between Minhardi Winter and H-44 Spring Wheats*. U.S. Department of  
597 Agriculture, 1931.
- 598 35. Yves Castonguay, Serge Laberge, E Charles Brummer, and Jeffrey J Volenec. Alfalfa winter  
599 hardiness: A research retrospective and integrated perspective. In *Advances in Agronomy*,  
600 volume 90, pages 203–265. Academic Press, January 2006.
- 601 36. Pauline Bristiel, Lauren Gillespie, Liv Østrem, Jennifer Balachowski, Cyrille Violle, and Flo-

- 603 rence Volaire. Experimental evaluation of the robustness of the growth–stress tolerance  
604 trade-off within the perennial grass *dactylis glomerata*. *Funct. Ecol.*, 32(8):1944–1958, Au-  
605 gust 2018.
- 606 37. Kari Koehler, Alyson Center, and Jeannine Cavender-Bares. Evidence for a freezing  
607 tolerance-growth rate trade-off in the live oaks (*quercus series virentes*) across the tropical-  
608 temperate divide. *New Phytol.*, 193(3):730–744, February 2012.
- 609 38. Craig Loehle. Height growth rate tradeoffs determine northern and southern range limits for  
610 trees. *J. Biogeogr.*, 25(4):735–742, July 1998.
- 611 39. Marco A Molina-Montenegro, Jorge Gallardo-Cerda, T S M Flores, and Cristian Atala. The  
612 trade-off between cold resistance and growth determines the nothofagus pumilio treeline.  
613 *Plant Ecol.*, 213(1):133–142, January 2012.
- 614 40. Jessica A Savage and Jeannine Cavender-Bares. Phenological cues drive an apparent  
615 trade-off between freezing tolerance and growth in the family salicaceae. *Ecology*, 94(8):  
616 1708–1717, August 2013.
- 617 41. Ying Zhen, Preeti Dhakal, and Mark C Ungerer. Fitness benefits and costs of cold acclima-  
618 tion in *arabidopsis thaliana*. *Am. Nat.*, 178(1):44–52, July 2011.
- 619 42. Ellen Zuther, Elisa Schulz, Liam H Childs, and Dirk K Hincha. Clinal variation in the non-  
620 acclimated and cold-acclimated freezing tolerance of *arabidopsis thaliana* accessions. *Plant  
621 Cell Environ.*, 35(10):1860–1878, October 2012.
- 622 43. Matthew A Hannah, Dana Wiese, Susanne Freund, Oliver Fiehn, Arnd G Heyer, and Dirk K  
623 Hincha. Natural genetic variation of freezing tolerance in *arabidopsis*. *Plant Physiol.*, 142  
624 (1):98–112, September 2006.
- 625 44. Matthew W Horton, Glenda Willems, Eriko Sasaki, Maarten Koornneef, and Magnus Nord-  
626 borg. The genetic architecture of freezing tolerance varies across the range of *arabidopsis  
627 thaliana*. *Plant Cell Environ.*, 39(11):2570–2579, 2016.
- 628 45. Malia A Gehan, Sunchung Park, Sarah J Gilmour, Chuanfu An, Chin-Mei Lee, and Michael F  
629 Thomashow. Natural variation in the c-repeat binding factor cold response pathway cor-  
630 relates with local adaptation of *arabidopsis* ecotypes. *Plant J.*, 84(4):682–693, November  
631 2015.
- 632 46. Astrid Junker, Moses M Muraya, Kathleen Weigelt-Fischer, Fernando Arana-Ceballos,  
633 Christian Klukas, Albrecht E Melchinger, Rhonda C Meyer, David Riewe, and Thomas Alt-  
634 mann. Optimizing experimental procedures for quantitative evaluation of crop plant perfor-  
635 mance in high throughput phenotyping systems. *Front. Plant Sci.*, 5:770, 2014.
- 636 47. Stephen E Fick and Robert J Hijmans. WorldClim 2: new 1-km spatial resolution climate  
637 surfaces for global land areas. *Int. J. Climatol.*, 37(12):4302–4315, October 2017.
- 638 48. R Core Team. R: a language and environment for statistical computing, 2017.
- 639 49. Envel Kerdaffrec, Danièle L Filiault, Arthur Korte, Eriko Sasaki, Viktoria Nizhynska, Ümit  
640 Seren, and Magnus Nordborg. Multiple alleles at a single locus control seed dormancy in  
641 swedish *arabidopsis*. *Elife*, 5, December 2016.
- 642 50. Moises Exposito-Alonso, Claude Becker, Verena J Schuenemann, Ella Reiter, Claudia Set-  
643 zer, Radka Slovak, Benjamin Brachi, Jörg Hagemann, Dominik G Grimm, Jiahui Chen, Wolf-  
644 gang Busch, Joy Bergelson, Rob W Ness, Johannes Krause, Hernán A Burbano, and Detlef  
645 Weigel. The rate and potential relevance of new mutations in a colonizing plant lineage.  
646 *PLoS Genet.*, 14(2):e1007155, February 2018.
- 647 51. Rob Patro, Geet Duggal, Michael I Love, Rafael A Irizarry, and Carl Kingsford. Salmon  
648 provides fast and bias-aware quantification of transcript expression. *Nat. Methods*, 14(4):  
649 417–419, April 2017.
- 650 52. Xiang Zhou and Matthew Stephens. Genome-wide efficient mixed-model analysis for asso-  
651 ciation studies. *Nat. Genet.*, 44(7):821–824, June 2012.



652 **Supplemental data**

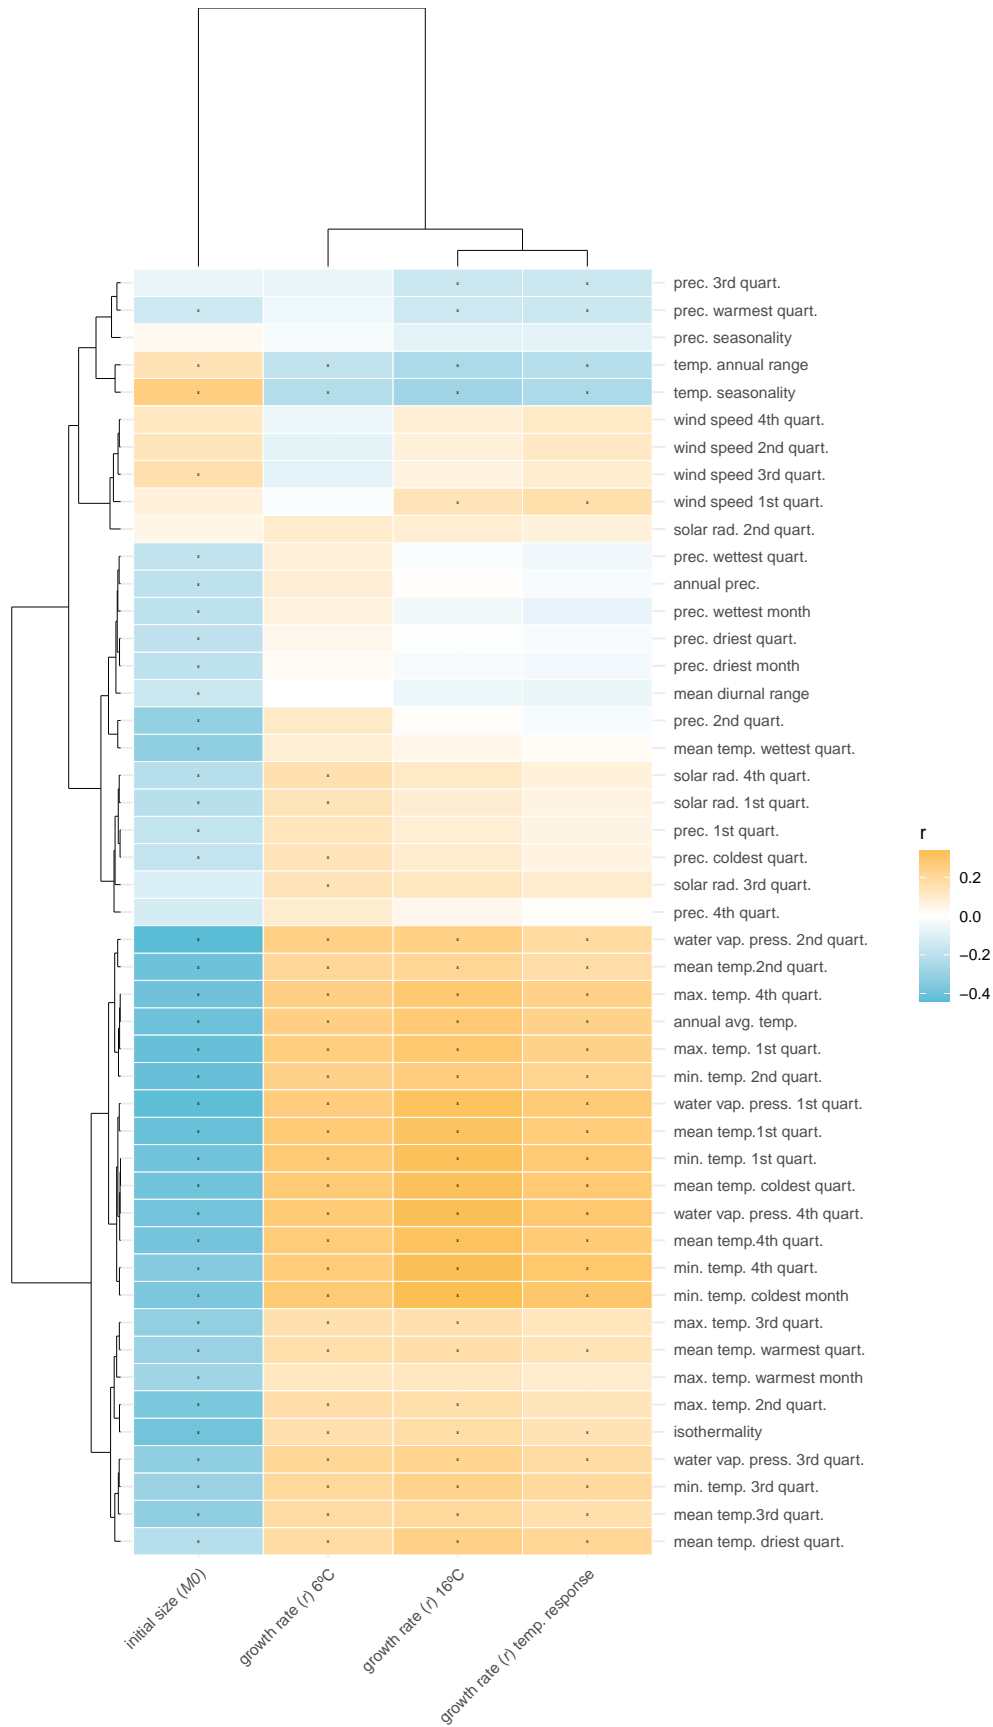

**Fig. S1.** Correlations between growth parameters and (bio)climate variables. (Bio)climate variables taken from the worldclim database (<https://www.worldclim.org>). Colors are correlation coefficients, correlations with FDR corrected p-values lower than 0.05 are indicated with a star. The order of the climate variables and phenotypes is based on hierarchical clustering.

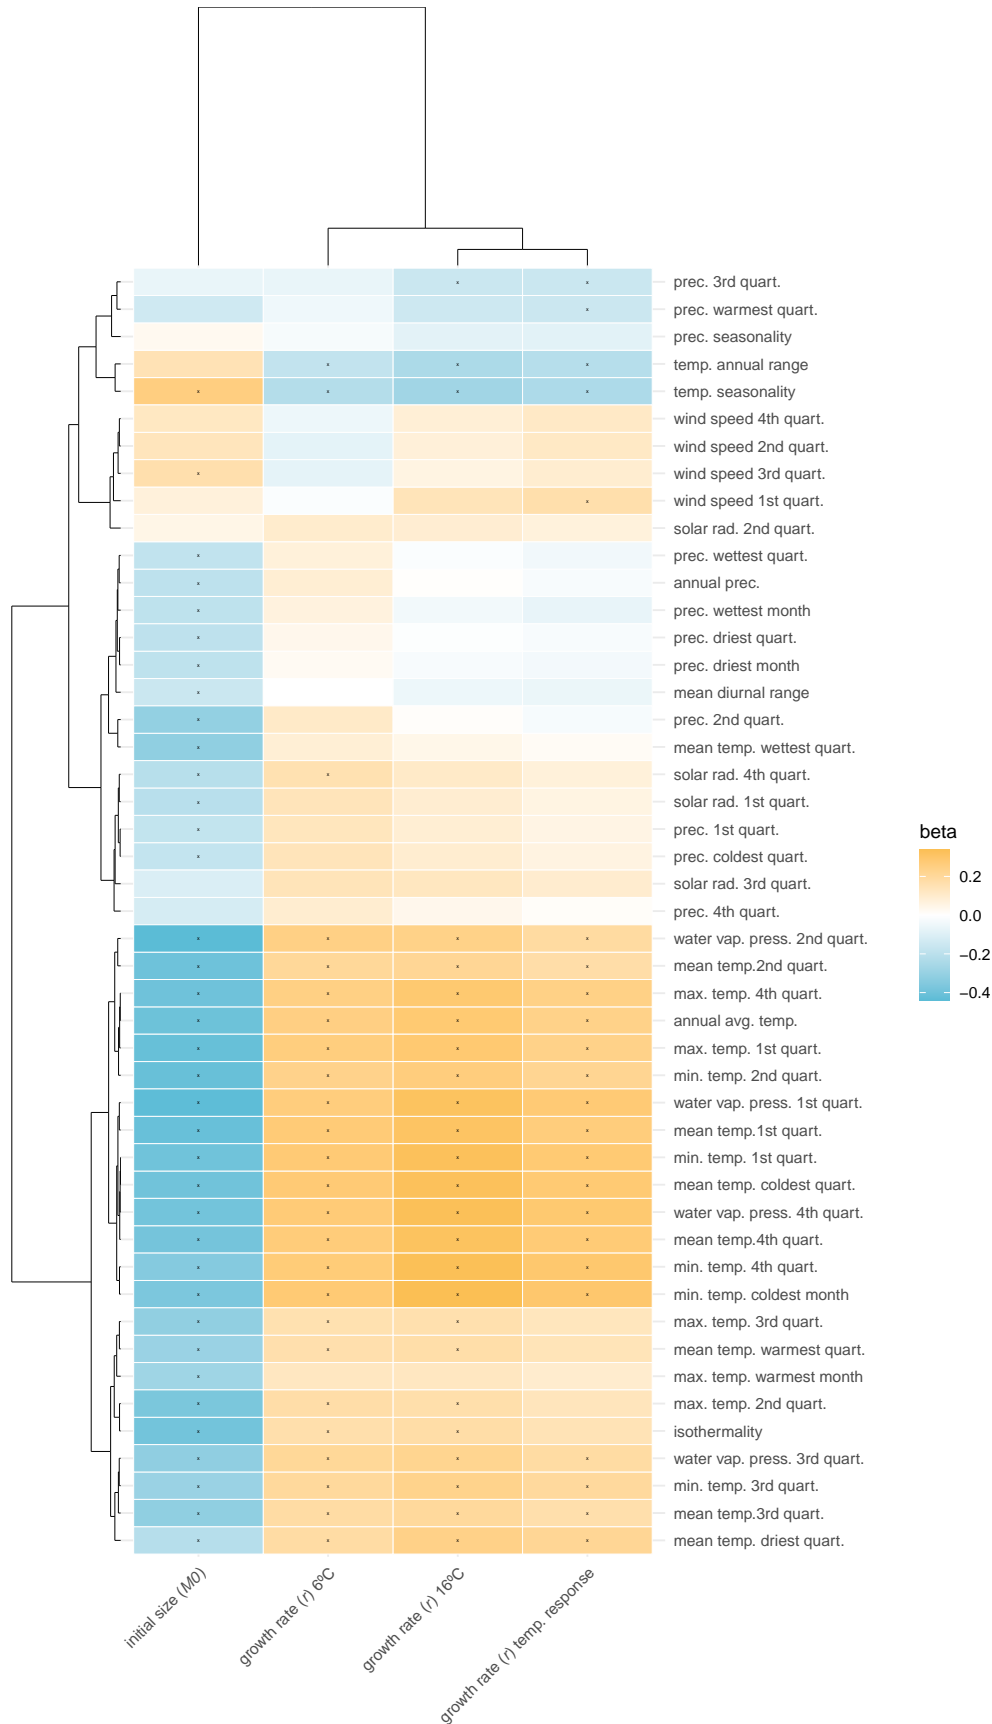

**Fig. S2.** Population structure corrected correlations between growth parameters and (bio)climate variables. (Bio)climate variables taken from the worldclim database (<https://www.worldclim.org>). Colors are the coefficients for the climate variable in the mixed model with phenotype as dependent variable and population structure as random factor. Phenotypes and climate variables were standardized, making regression coefficients comparable to correlation coefficients. Correlations with FDR corrected p-values lower than 0.05 are indicated with a star. The order of the climate variables and phenotypes is based on hierarchical clustering.

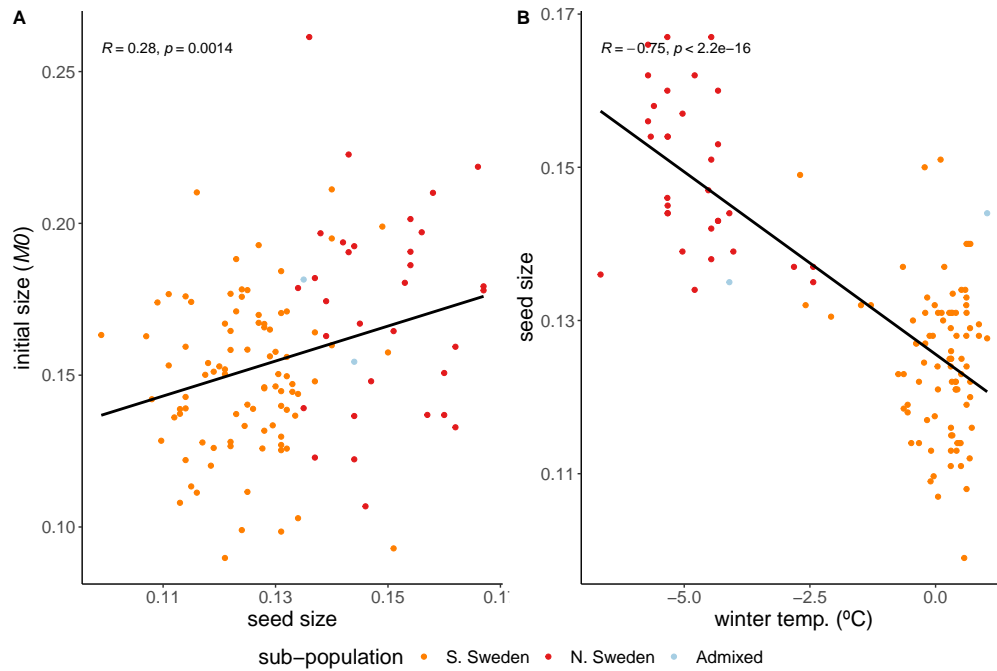

**Fig. S3.** Correlation between initial size and seed size (A) and between seed size and winter temperature (B) for a subset of 123 Swedish accessions.

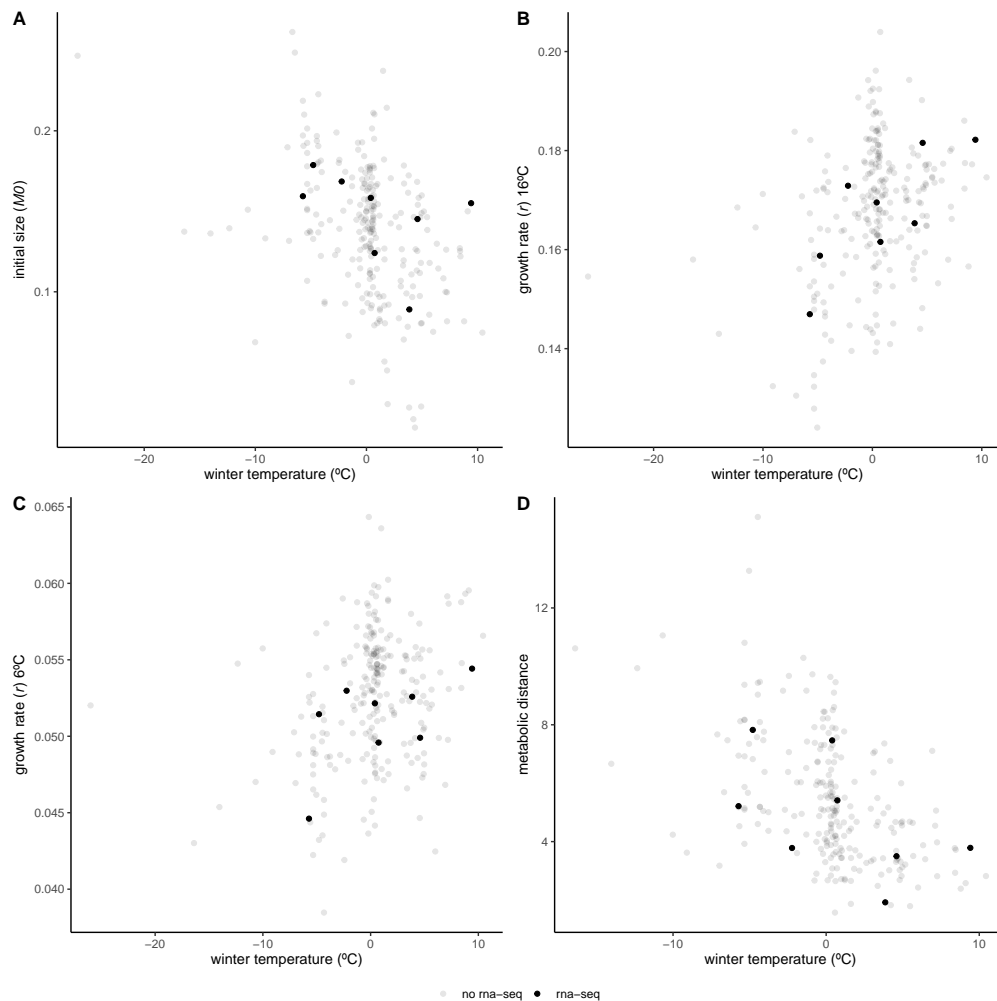

**Fig. S4.** Growth parameters and metabolic distance of rna-sequenced accessions in relation to local mean temperature of coldest quarter. Initial size (A), growth rate at 16°C (B) and 6°C (C), and metabolic distance (D), as a measure of temperature response over all 37 measured primary metabolites (21). Accessions selected for RNA-sequencing are depicted in black, remaining accessions are shown in gray.



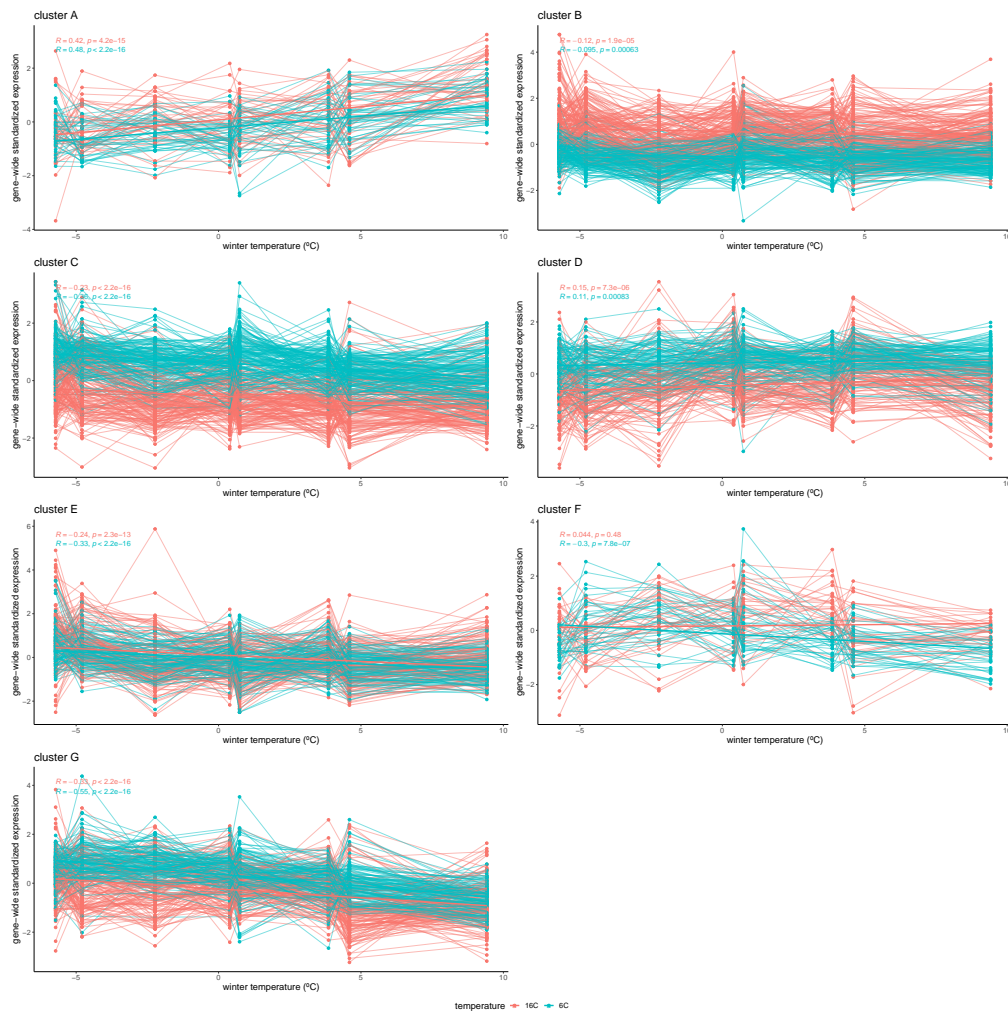

**Fig. S5.** Cluster-specific expression in relation to winter temperature. Gene-wide standardized expression in 16°C (red) and 6°C (blue) values are plotted for each gene in clusters 1-7 (A-G), as defined in Figure 5. Expression values of each gene are connected with thin lines. Thick lines represent the correlation of the cluster's expression with the accession's winter temperature.

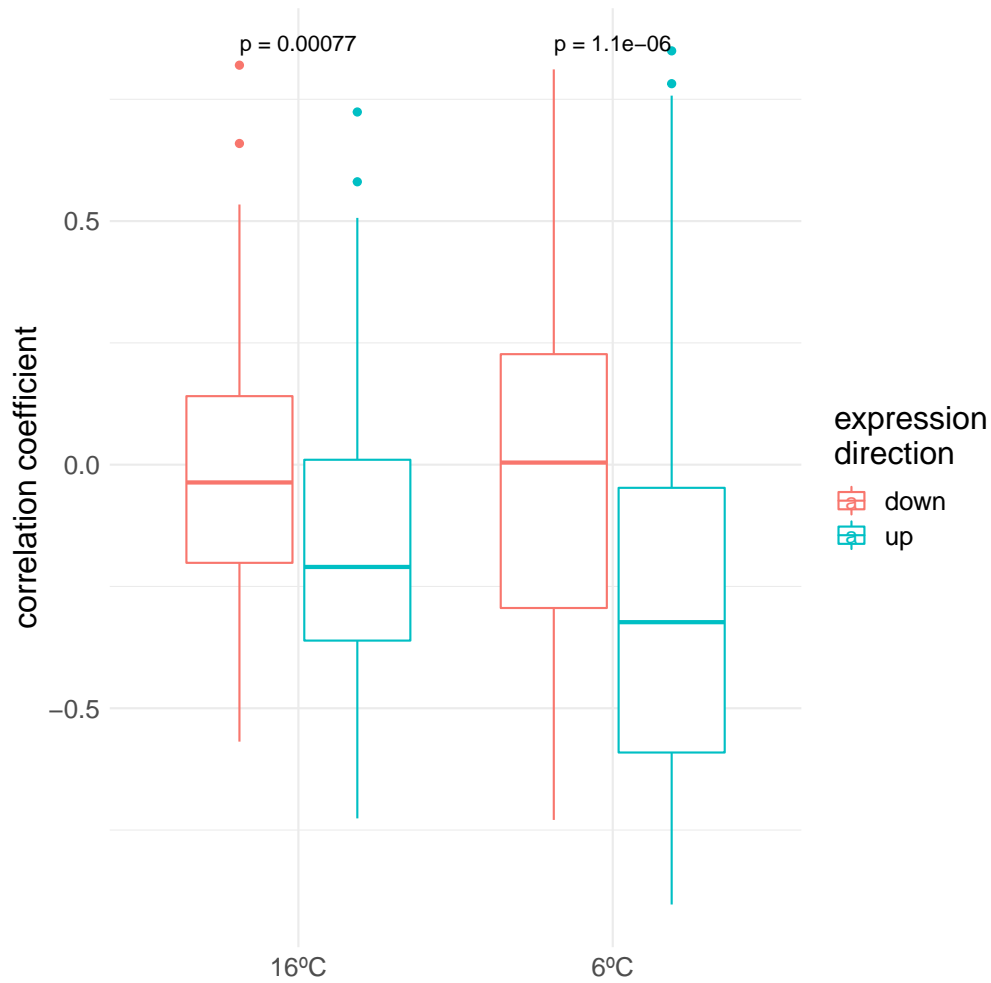

**Fig. S6.** Gene expression correlations with winter temperature. Correlation coefficients of each gene's correlations with winter temperature are grouped by the experimental temperature (16°C and 6°C) and by the expression direction upon cold exposure as measured by Park et al. and Vogel et al. (22) (23).

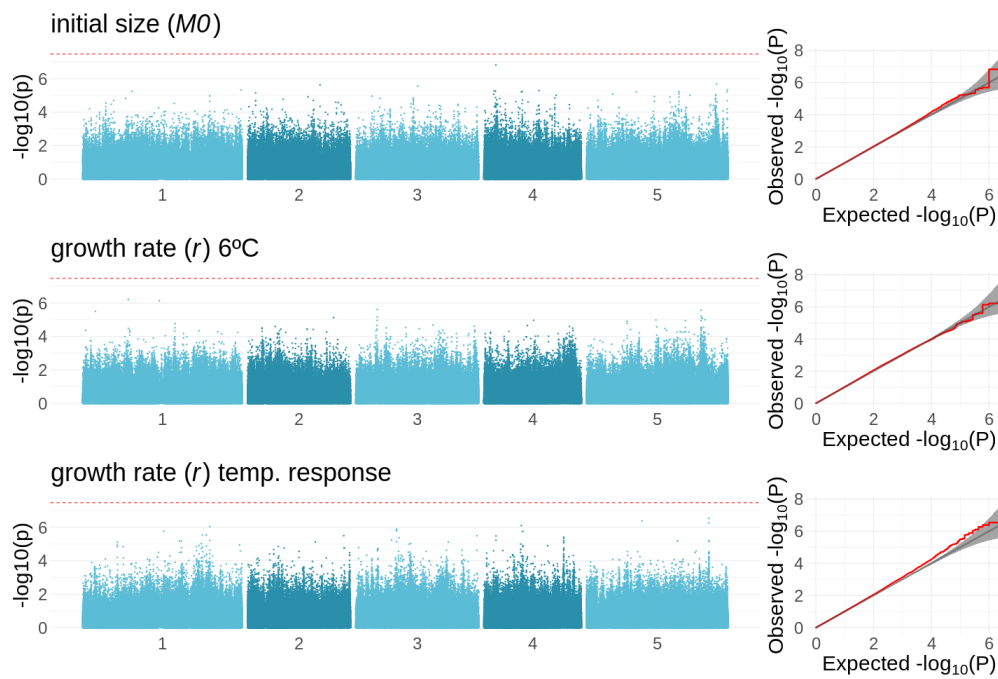

**Fig. S7.** GWAS results for the initial size, growth rate at 6°C and the temperature response of the growth rate. Left: Manhattan plots showing the significance of the association between the initial size, growth rate in 6°C and the growth rate's temperature response, and each of the tested SNPs. The Bonferroni-corrected threshold is visualized with the dashed red line. Right: QQ-plots showing the relation between observed and expected  $-\log_{10}(P)$  distributions for each of the respective GWAS. Red line shows the observed relationship. Gray line and band show the expected relationship under the null hypothesis of no differentiation between both distributions.
